# Supplementary material for: Respiratory symptoms and health-related quality of life in post-tuberculosis subjects with physician-diagnosed bronchiectasis: a cross-sectional study
Source: PubMed Central journal article supplement — J Thorac Dis. 2021 Aug;13(8):4894–902. doi: 10.21037/jtd-20-3028 (PMC8411162; doi:10.21037/jtd-20-3028), 2021-08
Supplement: jtd-13-08-4894-dss.pdf [file jtd-13-08-4894-dss.pdf]

## Data Sharing Statement

|                     |                                                                                                                                                    |                                                                                                                        |
|---------------------|----------------------------------------------------------------------------------------------------------------------------------------------------|------------------------------------------------------------------------------------------------------------------------|
| <b>Article Info</b> | <a href="https://dx.doi.org/10.21037/jtd-20-3028">https://dx.doi.org/10.21037/jtd-20-3028</a>                                                      |                                                                                                                        |
| <b>Item</b>         | <b>Question</b>                                                                                                                                    | <b>Authors' Response<br/>(place "-" if not applicable)</b>                                                             |
| 1                   | Would you like to share data collected for your study to others?                                                                                   | Yes                                                                                                                    |
| 2                   | If not, would you like to share the reason for your decision?                                                                                      |                                                                                                                        |
| 3                   | What data in particular will be shared?                                                                                                            | All data from this NHANES survey are publicly available through the Korea NHANES website.                              |
| 4                   | Any other documents will be share? Such as study protocol, statistical analysis plan, informed consent form, clinical study report, analytic code. | -                                                                                                                      |
| 5                   | When will data availability begin?                                                                                                                 | -                                                                                                                      |
| 6                   | When will data availability end?                                                                                                                   | -                                                                                                                      |
| 7                   | To whom will you share the data?                                                                                                                   | -                                                                                                                      |
| 8                   | For what type of analysis or purpose?                                                                                                              | -                                                                                                                      |
| 9                   | How or where can the data/documents be obtained?                                                                                                   | Data can be downloaded from the website following: <a href="https://knhanes.cdc.go.kr">https://knhanes.cdc.go.kr</a> . |
| 10                  | Any other restrictions?                                                                                                                            | -                                                                                                                      |
